# Supplementary material for: A melamine-based organic–inorganic hybrid material revealing excellent optical performance and moderate thermal stability
Source: Royal Society of Chemistry journal article supplement (doi:10.1039/d1tc01819a), 2021-01-01
Supplement: d1tc01819a1.pdf [file d1tc01819a1.pdf]

## **A Melamine-Based Organic-Inorganic Hybrid Material Revealing**

### **Excellent Optical Performance and Moderate Thermal Stability**

Lehui Liu,<sup>a,b</sup> Zhiyong Bai,<sup>c</sup> Lei Hu,<sup>d</sup> Dongshan Wei<sup>e</sup>, Zhoubin Lin<sup>\*a, b</sup>, and Lizhen Zhang<sup>\*a, b</sup>,

<sup>a</sup> Key Laboratory of Optoelectronic Materials Chemistry and Physics, Fujian Institute of Research on the Structure of Matter, Chinese Academy of Sciences, Fuzhou, Fujian, 350002, P. R. China

<sup>b</sup> Fujian Science & Technology Innovation Laboratory for Optoelectronic Information of China, Fuzhou, Fujian, 350108, China

<sup>c</sup> University of Chinese Academy of Sciences, Beijing 100049, P. R. China

<sup>d</sup> School of Environmental and Chemical Engineering, Chongqing Three Gorges University, Chongqing, 404100, China

<sup>e</sup> School of Electronic Engineering, Dongguan University of Technology, Dongguan, 523808, China

**Table S1. Fractional Atomic Coordinates ( $\times 10^4$ ) and Equivalent Isotropic Displacement Parameters ( $\text{\AA}^2 \times 10^3$ ) for compound 1.  $U_{\text{eq}}$  is defined as 1/3 of the trace of the orthogonalised  $U_{ij}$  tensor.**

| Atom | <i>x</i>   | <i>y</i> | <i>z</i>   | U(eq)    |
|------|------------|----------|------------|----------|
| Zn1  | 9115.3(11) | 4349(2)  | 7445.3(8)  | 28.6(3)  |
| Cl1  | 9919(2)    | 2555(3)  | 9047.0(15) | 33.5(4)  |
| Cl2  | 10016(2)   | 7455(3)  | 7775.4(18) | 38.3(5)  |
| Cl3  | 9827(2)    | 2721(4)  | 6011.4(16) | 37.9(5)  |
| C1   | 4046(8)    | 5759(12) | 6685(6)    | 26.4(15) |
| C2   | 6133(8)    | 5094(11) | 7955(6)    | 23.8(15) |
| C3   | 6118(8)    | 5127(12) | 6058(6)    | 25.2(16) |
| C4   | 5871(8)    | 5669(12) | 1973(6)    | 26.8(16) |
| C5   | 3787(8)    | 5090(12) | 2619(6)    | 23.8(15) |
| C6   | 3783(8)    | 5153(12) | 668(6)     | 25.5(16) |
| N1   | 4719(7)    | 5605(11) | 7763(5)    | 27.1(14) |
| N2   | 4708(7)    | 5520(11) | 5805(5)    | 30.6(16) |
| N3   | 6898(6)    | 4838(10) | 7117(5)    | 23.9(14) |
| N4   | 6831(7)    | 5094(13) | 5219(5)    | 40(2)    |
| N5   | 2650(7)    | 6211(14) | 6459(6)    | 41.4(19) |
| N6   | 6815(7)    | 4901(11) | 9011(5)    | 32.8(17) |
| N7   | 3054(7)    | 4859(11) | 1524(5)    | 29.2(16) |
| N8   | 5201(7)    | 5502(12) | 878(5)     | 29.7(15) |
| N9   | 5187(7)    | 5532(11) | 2852(5)    | 28.8(14) |
| N10  | 3057(7)    | 4843(10) | 3428(5)    | 31.2(16) |
| N11  | 3037(8)    | 5090(13) | -367(5)    | 42(2)    |
| N12  | 7271(7)    | 6028(13) | 2201(6)    | 39.1(18) |

**Table S2. Anisotropic Displacement Parameters ( $\text{\AA}^2 \times 10^3$ ) for compound 1. The Anisotropic displacement factor exponent takes the form:  $-2\pi^2[h^2a^{*2}U_{11}+2hka^*b^*U_{12}+\dots]$ .**

| Atom | $U_{11}$ | $U_{22}$ | $U_{33}$ | $U_{23}$ | $U_{13}$ | $U_{12}$ |
|------|----------|----------|----------|----------|----------|----------|
| Zn1  | 21.9(5)  | 37.1(6)  | 25.6(5)  | -0.4(5)  | 2.3(4)   | 0.4(6)   |
| Cl1  | 25.5(8)  | 42.2(11) | 31.3(9)  | 6.9(9)   | 2.1(7)   | 1.3(8)   |
| Cl2  | 28.0(9)  | 35.7(11) | 50.9(12) | -5.2(10) | 7.5(8)   | -3.5(9)  |
| Cl3  | 29.1(10) | 53.0(13) | 30.2(9)  | -5.9(10) | 2.7(7)   | 7.3(10)  |
| C1   | 21(3)    | 32(4)    | 26(4)    | -1(3)    | 4(3)     | 1(3)     |
| C2   | 22(3)    | 28(4)    | 22(3)    | 1(3)     | 4(3)     | 4(3)     |
| C3   | 21(3)    | 34(4)    | 20(4)    | 0(3)     | 3(3)     | 0(3)     |
| C4   | 24(4)    | 35(4)    | 20(3)    | 3(3)     | 0(3)     | -3(3)    |
| C5   | 21(3)    | 30(4)    | 19(3)    | -2(3)    | 1(3)     | 1(3)     |
| C6   | 23(4)    | 33(4)    | 19(3)    | -2(3)    | 1(3)     | 0(3)     |
| N1   | 23(3)    | 38(4)    | 19(3)    | 2(3)     | 3(2)     | -1(3)    |
| N2   | 22(3)    | 48(5)    | 20(3)    | -1(3)    | 2(2)     | 4(3)     |
| N3   | 17(3)    | 37(4)    | 16(3)    | 0(3)     | 2(2)     | 1(3)     |
| N4   | 22(3)    | 81(6)    | 15(3)    | 5(3)     | 1(2)     | 14(3)    |
| N5   | 23(3)    | 75(6)    | 25(3)    | 3(4)     | 2(3)     | 5(4)     |
| N6   | 24(3)    | 56(5)    | 17(3)    | 1(3)     | 3(2)     | 6(3)     |
| N7   | 17(3)    | 44(4)    | 25(3)    | -2(3)    | 1(2)     | -1(3)    |
| N8   | 21(3)    | 47(4)    | 19(3)    | 0(3)     | 2(2)     | -1(3)    |
| N9   | 26(3)    | 38(4)    | 22(3)    | -1(3)    | 5(2)     | 1(3)     |
| N10  | 25(3)    | 44(5)    | 25(3)    | 2(3)     | 6(3)     | -2(3)    |
| N11  | 24(3)    | 77(6)    | 21(3)    | -1(3)    | -2(3)    | -6(3)    |
| N12  | 22(3)    | 64(5)    | 30(4)    | 6(4)     | 3(3)     | -4(4)    |

**Table S3. Bond Lengths for compound 1.**

| Atom | Atom | Length/ $\text{\AA}$ | Atom | Atom | Length/ $\text{\AA}$ |
|------|------|----------------------|------|------|----------------------|
| Zn1  | Cl1  | 2.282(2)             | N9   | C5   | 1.316(9)             |
| Zn1  | Cl2  | 2.260(3)             | N8   | C6   | 1.319(9)             |
| Zn1  | Cl3  | 2.269(2)             | N9   | C4   | 1.355(9)             |
| Zn1  | N3   | 2.057(6)             | N8   | C4   | 1.353(9)             |
| N1   | C1   | 1.336(10)            | N6   | C2   | 1.316(9)             |
| N1   | C2   | 1.340(9)             | N11  | C6   | 1.307(9)             |
| N2   | C1   | 1.349(9)             | N12  | C4   | 1.305(10)            |
| N2   | C3   | 1.319(9)             | N4   | C3   | 1.327(9)             |
| N3   | C2   | 1.369(9)             | N7   | C5   | 1.374(9)             |
| N3   | C3   | 1.356(9)             | N7   | C6   | 1.368(9)             |
| N10  | C5   | 1.316(9)             | N5   | C1   | 1.313(10)            |

**Table S4. Bond Angles for compound 1.**

| Atom | Atom | Atom | Angle/°    | Atom | Atom | Atom | Angle/°  |
|------|------|------|------------|------|------|------|----------|
| Cl3  | Zn1  | Cl1  | 107.53(10) | N6   | C2   | N1   | 117.4(7) |
| Cl2  | Zn1  | Cl1  | 107.01(9)  | N2   | C3   | N3   | 124.7(7) |
| Cl2  | Zn1  | Cl3  | 115.20(10) | N2   | C3   | N4   | 117.3(7) |
| N3   | Zn1  | Cl1  | 113.18(18) | N4   | C3   | N3   | 117.9(7) |
| N3   | Zn1  | Cl3  | 111.75(18) | N10  | C5   | N9   | 120.8(7) |
| N3   | Zn1  | Cl2  | 102.2(2)   | N10  | C5   | N7   | 118.4(7) |
| C2   | N3   | Zn1  | 122.4(5)   | N9   | C5   | N7   | 120.7(7) |
| C3   | N3   | Zn1  | 122.2(5)   | N8   | C6   | N7   | 121.0(6) |
| C3   | N3   | C2   | 115.2(6)   | N11  | C6   | N8   | 120.6(7) |
| C1   | N1   | C2   | 116.2(6)   | N11  | C6   | N7   | 118.3(7) |
| C3   | N2   | C1   | 116.0(6)   | N8   | C4   | N9   | 124.7(7) |
| C5   | N9   | C4   | 117.1(6)   | N12  | C4   | N9   | 117.4(7) |
| C6   | N8   | C4   | 116.8(6)   | N12  | C4   | N8   | 117.9(7) |
| C6   | N7   | C5   | 119.4(6)   | N1   | C1   | N2   | 124.5(7) |
| N1   | C2   | N3   | 123.3(6)   | N5   | C1   | N1   | 118.1(7) |
| N6   | C2   | N3   | 119.2(6)   | N5   | C1   | N2   | 117.4(7) |

**Table S5. Hydrogen Atom Coordinates ( $\text{\AA}\times 10^4$ ) and Isotropic Displacement Parameters ( $\text{\AA}^2\times 10^3$ ) for compound 1.**

| Atom | x       | y       | z       | U(eq) |
|------|---------|---------|---------|-------|
| H4A  | 6371.87 | 5322.84 | 4542.08 | 48    |
| H4B  | 7751.81 | 4842.53 | 5351.99 | 48    |
| H5A  | 2195.93 | 6398.66 | 6999.14 | 50    |
| H5B  | 2191.16 | 6319.94 | 5772.26 | 50    |
| H6A  | 6352.49 | 5100.81 | 9544.39 | 39    |
| H6B  | 7722.84 | 4574.24 | 9166.33 | 39    |
| H7   | 2146.35 | 4532.24 | 1378.58 | 35    |
| H10A | 3495.69 | 4969.75 | 4119.71 | 37    |
| H10B | 2142.69 | 4554.08 | 3265.69 | 37    |
| H11A | 3470.72 | 5276.17 | -918.28 | 50    |
| H11B | 2113.21 | 4861.61 | -495.66 | 50    |
| H12A | 7738.44 | 6151.01 | 1664.19 | 47    |
| H12B | 7726.77 | 6142.34 | 2889.22 | 47    |

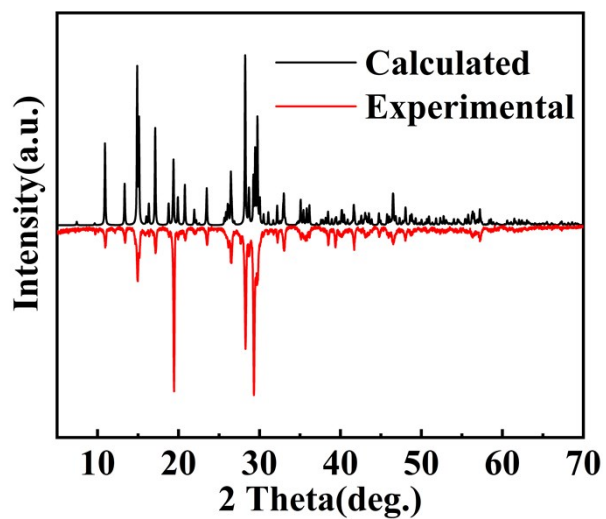

Figure S1. The Powder X-ray diffraction of compound 1.

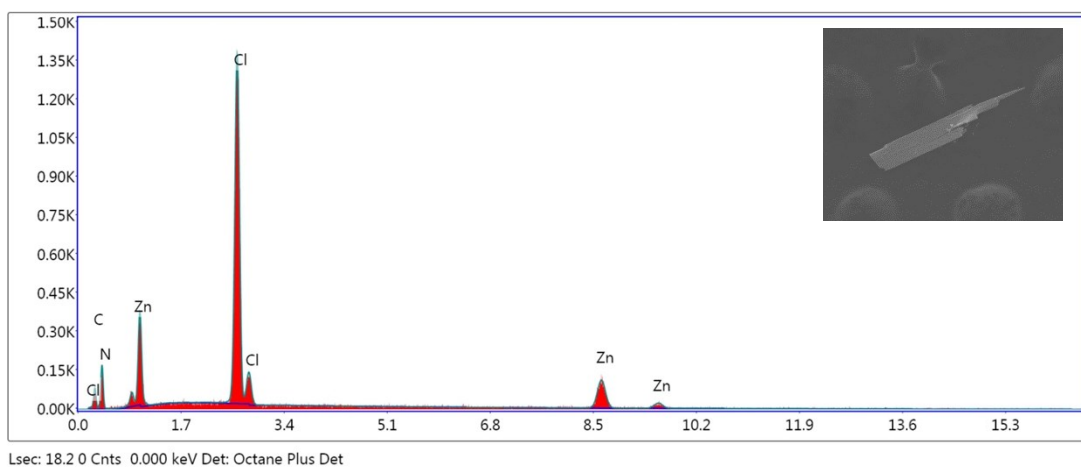

Figure S2. The Energy-dispersive X-ray Spectroscopy of compound 1.

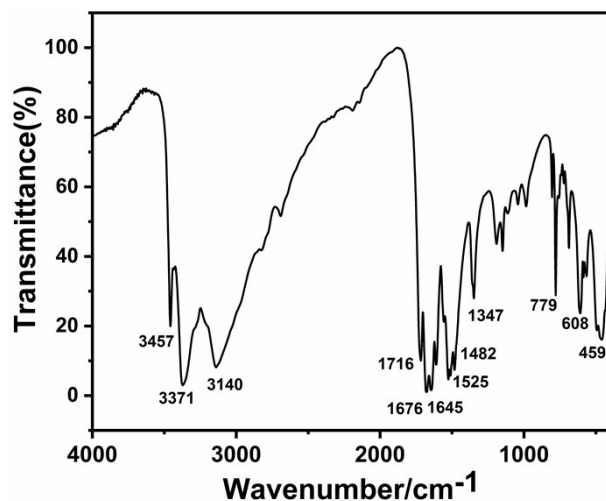

Figure S3. Room temperature powder IR spectrum of compound **1**.

Table S6 Wavenumbers of the bands observed in the powder infrared spectra of compound **1**.

| Wavenumbers (cm <sup>-1</sup> ) | Tentative assignment                                        |
|---------------------------------|-------------------------------------------------------------|
| 3457                            | NH <sub>2</sub> asym stretch                                |
| 3371                            | NH <sub>2</sub> asym stretch and N-H...Cl stretch           |
| 3140                            | N-H...N stretch                                             |
| 1716, 1676, 1645                | NH <sub>2</sub> bend                                        |
| 1525, 1482                      | Side-chain asym C-N stretch                                 |
| 1347                            | Ring: semi-circle stretch                                   |
| 779                             | Side-chain out-of-plane C-N bend                            |
| 608                             | NH <sub>2</sub> bend                                        |
| 459                             | Combination tone: NH <sub>2</sub> bend-NH <sub>2</sub> rock |

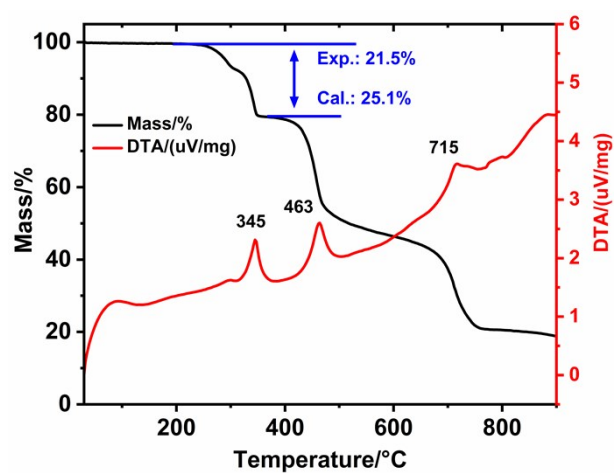

Figure S4. The thermal gravimetric analysis (TGA) and differential thermal analysis (DTA) curves of compound **1**.

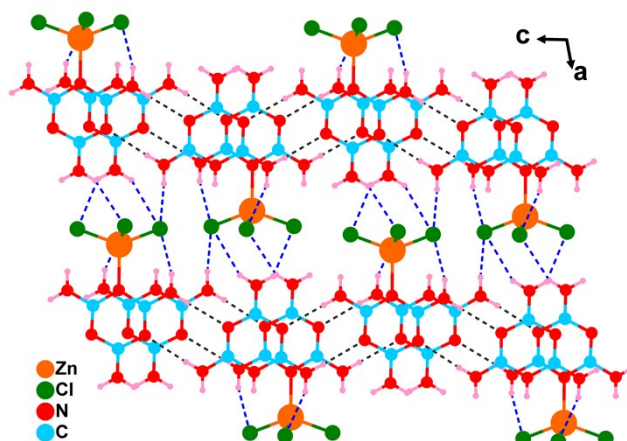

Figure S5. The H-Bonds of compound 1.

**Table S7. Hydrogen-bonding geometry (Å, °) of compound 1.**

| Donor --- H...Acceptor | [ARU]     | D - H | H...A | D...A    | D - H...A |
|------------------------|-----------|-------|-------|----------|-----------|
| N4---H4A...N9          | [1555.02] | 0.86  | 2.13  | 2.984(9) | 173       |
| N4---H4B...Cl3         | [-]       | 0.86  | 2.41  | 3.198(8) | 152       |
| N5---H5A...Cl2         | [1455.01] | 0.86  | 2.52  | 3.306(7) | 153       |
| N5---H5B...Cl3         | [2656.01] | 0.86  | 2.73  | 3.544(8) | 158       |
| N6---H6A...N8          | [1556.02] | 0.86  | 2.14  | 2.996(9) | 178       |
| N6---H6B...Cl1         | [-]       | 0.86  | 2.49  | 3.297(7) | 156       |
| N7---H7...Cl1          | [2656.01] | 0.86  | 2.78  | 3.274(7) | 118       |
| N7---H7...Cl2          | [2646.01] | 0.86  | 2.82  | 3.547(7) | 143       |
| N10---H10A...N2        | [1555.01] | 0.86  | 2.16  | 3.017(9) | 175       |
| N10---H10B...Cl2       | [2646.01] | 0.86  | 2.57  | 3.356(7) | 152       |
| N11---H11A...N1        | [1554.01] | 0.86  | 2.18  | 3.034(9) | 175       |
| N11---H11B...Cl1       | [1454.01] | 0.86  | 2.54  | 3.328(8) | 152       |
| N12---H12A...Cl1       | [2756.01] | 0.86  | 2.69  | 3.447(7) | 148       |
| N12---H12B...Cl3       | [2756.01] | 0.86  | 2.63  | 3.312(7) | 137       |

Translation of ARU-Code to CIF and Equivalent Position Code:

[2646.] = [2\_646] = 1-x, -1/2 +y, 1-z; [1556.] = [1\_556] = x, y, 1 +z; [1455.] = [1\_455] = -1 +x, y, z'; [2656.] = [2\_656] = 1-x, 1/2 +y, 1-z; [1554.] = [1\_554] = x, y, -1 +z; [1454.] = [1\_454] = -1 +x, y, -1 +z; [2756.] = [2\_756] = 2-x, 1/2 +y, 1-z.



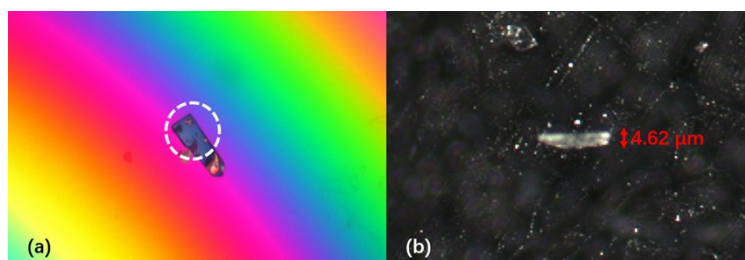

Figure S6. (a)Compound **1** achieving extinction. (b)The thickness of the crystal.

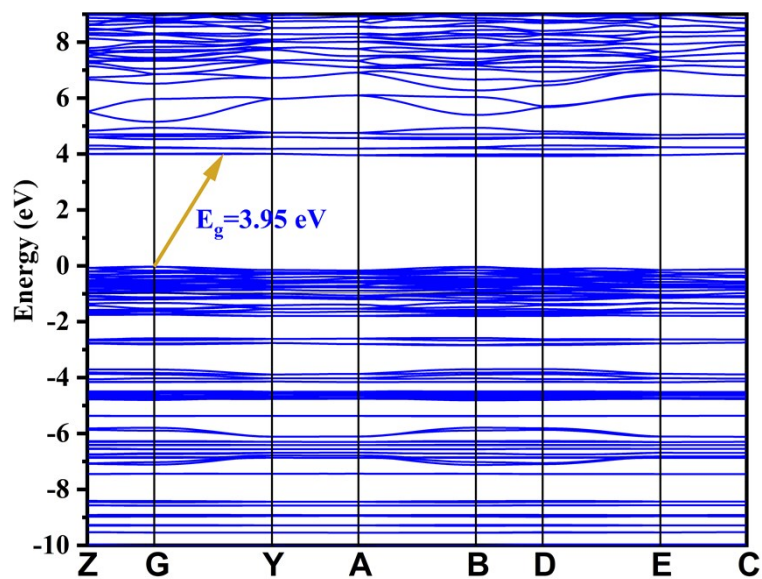

Figure. S7 Electronic band structures of compound 1.

Table S8. Calculation of dipole moment for  $[\text{ZnNCl}_3]$  polyhedral for unit cells.

| Species                      | x-component | y-component | z-component | Total magnitude |
|------------------------------|-------------|-------------|-------------|-----------------|
| $[\text{Zn}(1)\text{NCl}_3]$ | -3.3878598  | 0.2800433   | -1.42552    | 3.686207        |
| $[\text{Zn}(2)\text{NCl}_3]$ | 3.3878924   | 0.2800701   | 1.425489    | 3.686228        |
